# Supplementary material for: Ultrathin branched PtFe and PtRuFe nanodendrites with enhanced electrocatalytic activity
Source: Royal Society of Chemistry journal article supplement (doi:10.1039/c4ta04698f), 2014-11-10
Supplement: c4ta04698f1.pdf [file c4ta04698f1.pdf]

## Supporting Information

### Ultrathin branched PtFe and PtRuFe nanodendrites with enhanced electrocatalytic activity

Zhao Cai, Yun Kuang, Xiaohan Qi, Peng Wang, Ying Zhang, Zhichao Zhang and Xiaoming Sun\*

State Key Laboratory of Chemical Resource Engineering, Beijing University of Chemical Technology, Beijing 100029, P. R. China

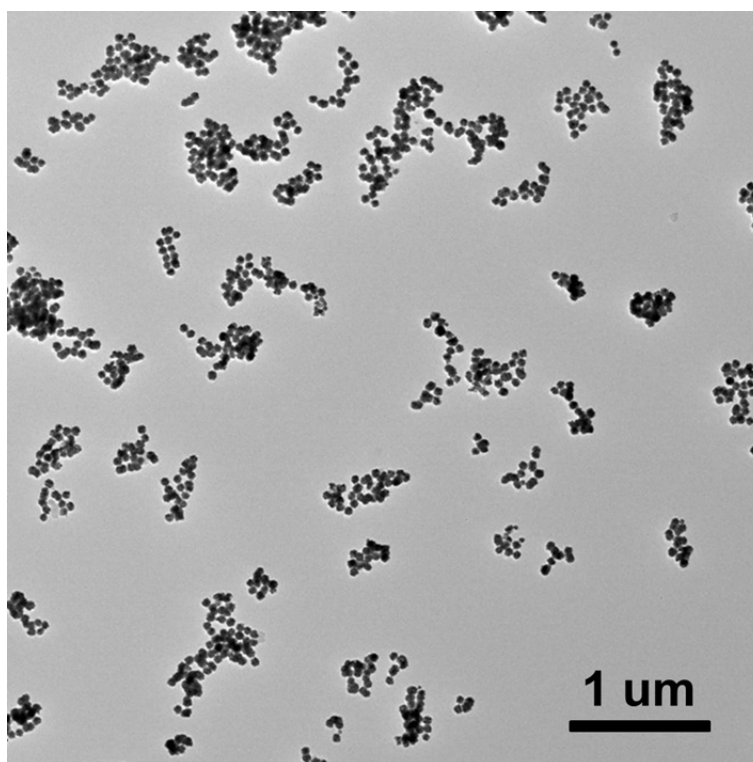

Figure S1. TEM image of PtFe nanodendrites.

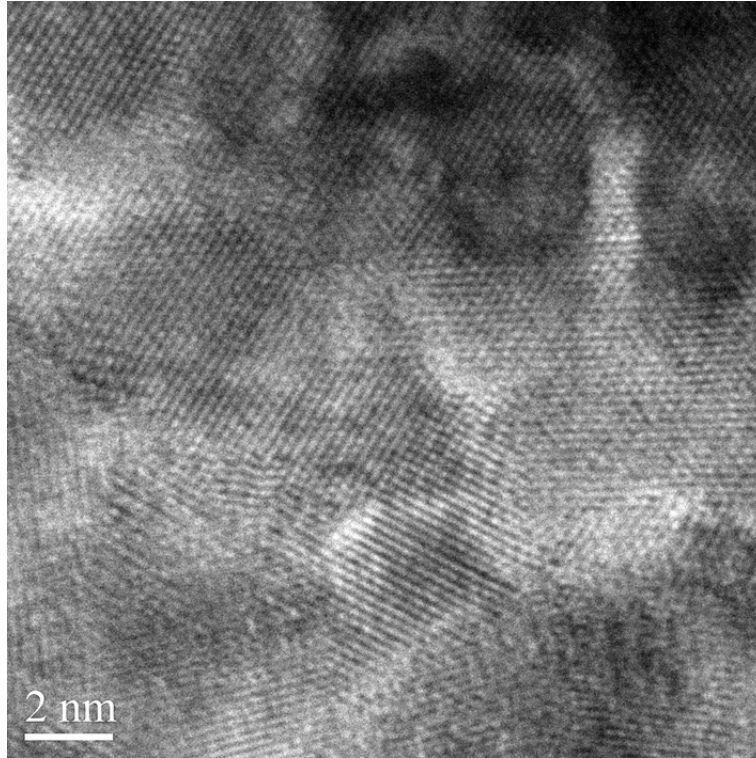

**Figure S2.** HRTEM image of polycrystalline PtFe nanodendrite and its different lattice orientations.

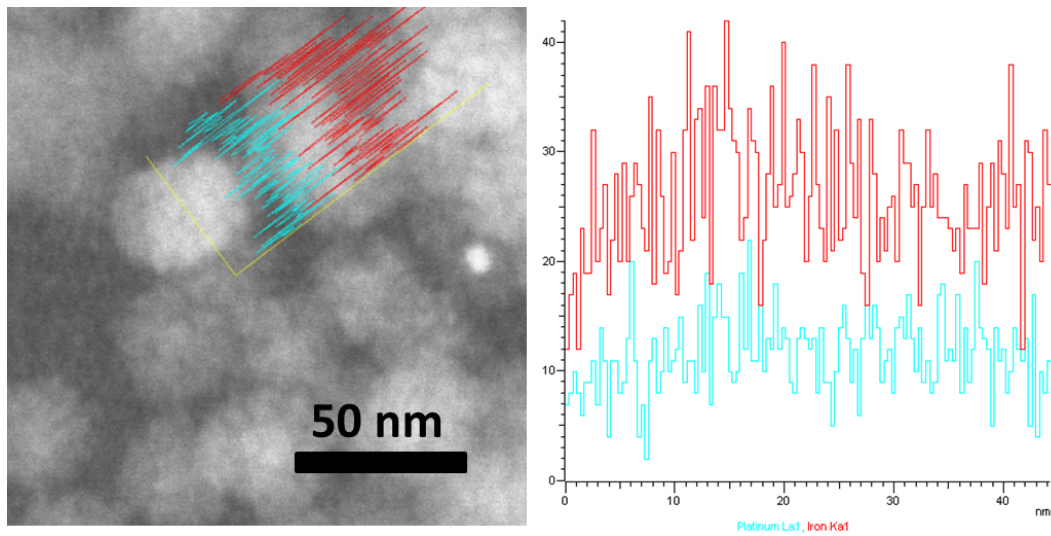

**Figure S3.** EDX line scanning profiles of PtFe nanodendrites.

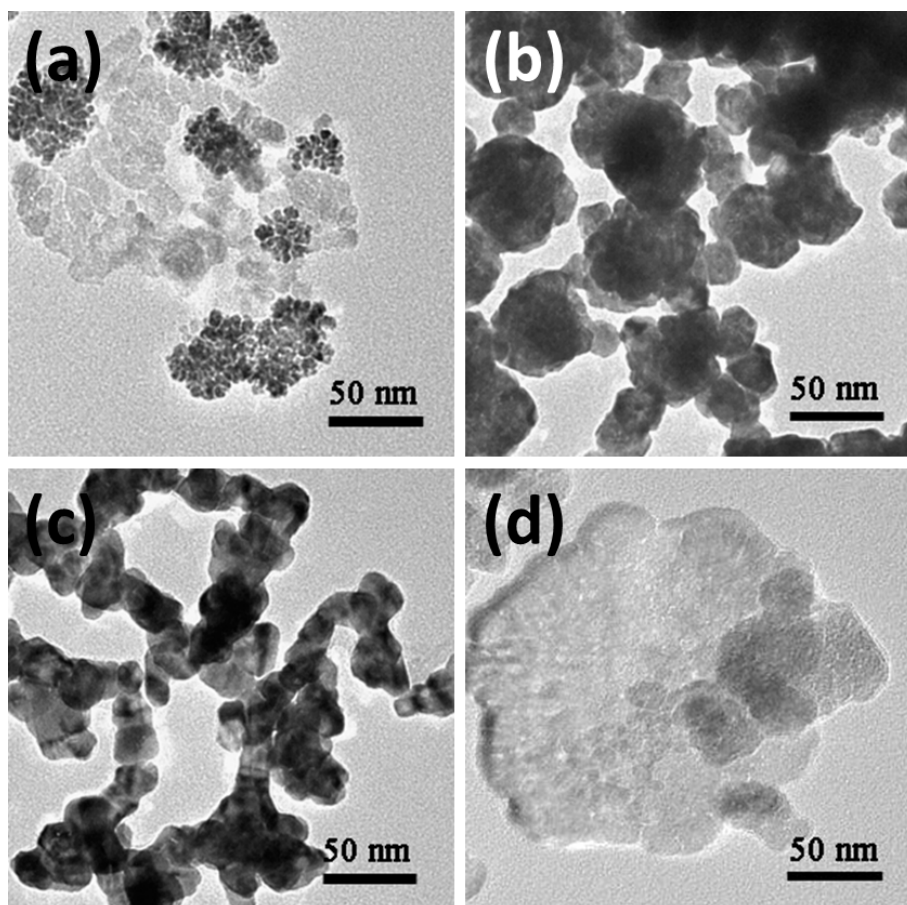

**Figure S4.** TEM images of morphology evolution for PtFe nanodendrites with different Pt/Fe precursor molar ratios: (a) 1:3, (b) 3:1, (c) 4:0, and (d) 0:4.

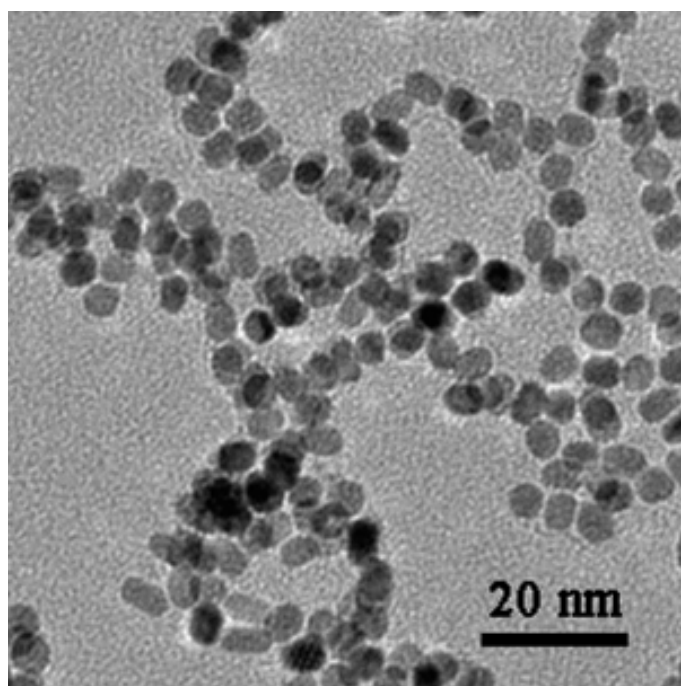

**Figure S5.** Influence of Pt precursor species on the formation of PtFe nanodendrites: Changing  $\text{Pt}(\text{acac})_2$  to  $\text{K}_2\text{PtCl}_4$ .

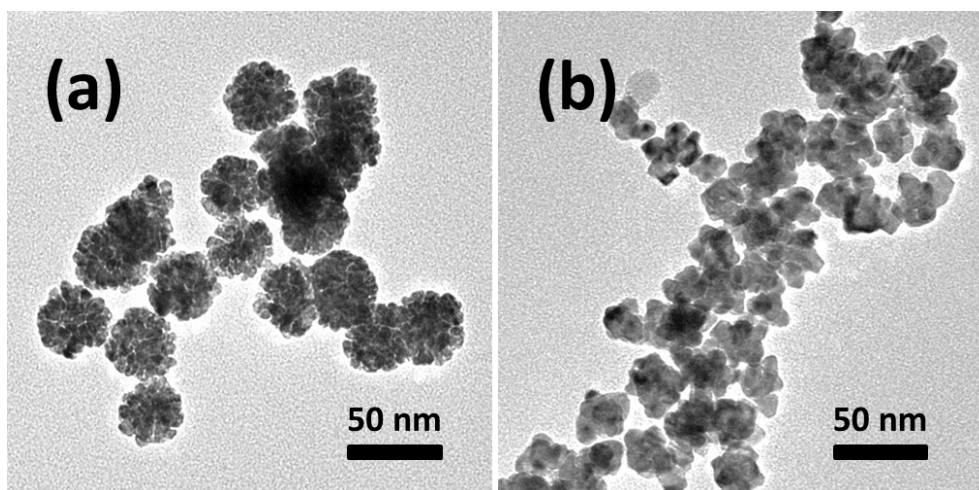

**Figure S6.** TEM images of the PtFe nanodendrites synthesized (a) with KCl and (b) without KI.

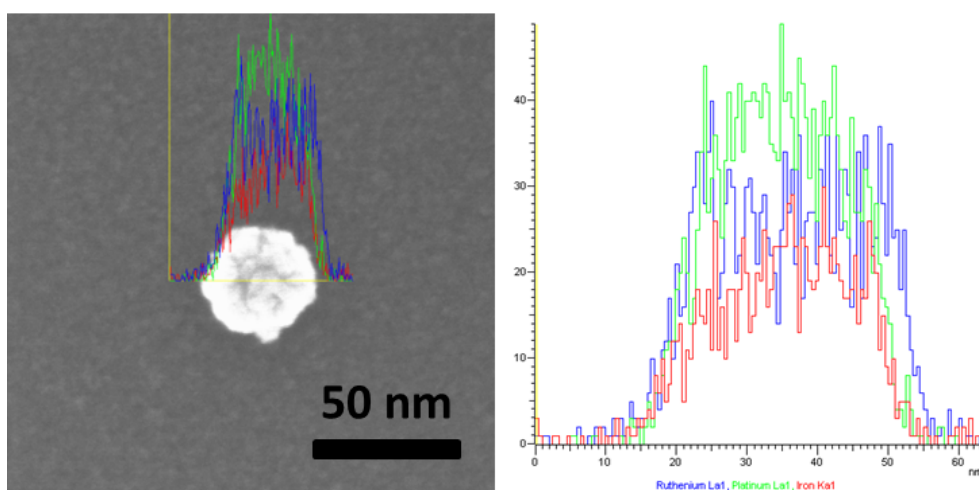

**Figure S7.** EDX line scanning profiles of PtRuFe nanodendrites.

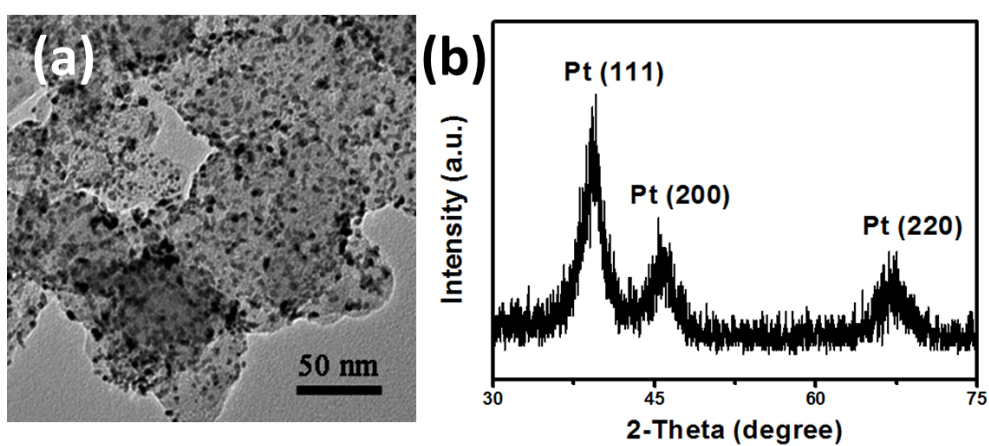

**Figure S8.** (a) TEM image and (b) XRD pattern of the commercial Pt/C (40 wt.% Pt, Alfa) electrocatalysts.

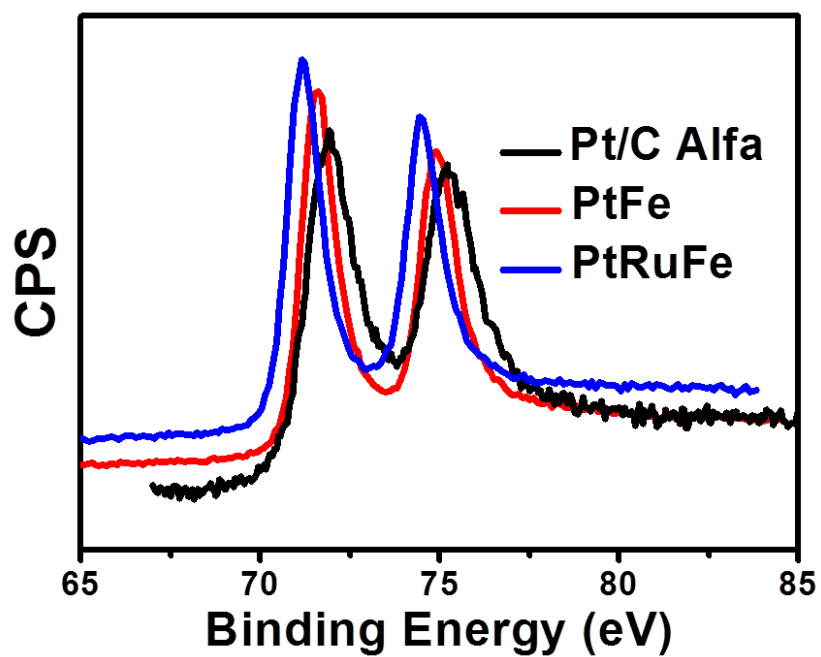

Figure S9. XPS data of PtFe and PtRuFe nanodendrites.

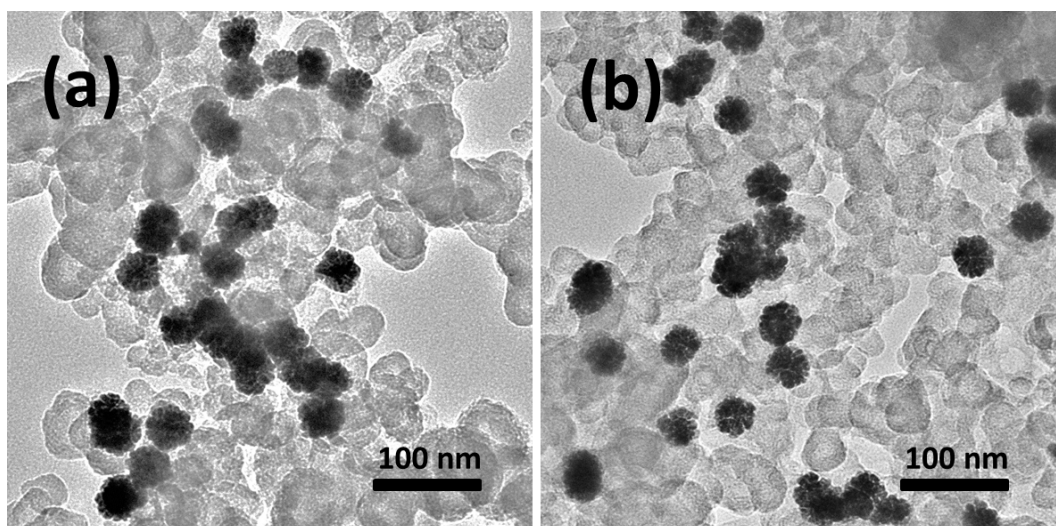

Figure S10. Representative TEM image of the PtRuFe nanodendrites (a) before and (b) after 1000 s CA measurement.
